# Supplementary material
Source: publisher site journal article supplement (https://www.spandidos-publications.com/4811/downloadSupplementary)
Supplement: Supplementary file 1 [file downloadSupplementary]

## Sheet: Table SII
Table SII. Differentially expressed genes after GPX2 overexpression in SW1573 cells.
Gene name	log2 FC	P-value
FGB	3.80245	3.56891
FGA	3.24337	2.74903
CPS1	3.03135	3.65964
CYP24A1	2.82447	3.22835
MMP1	2.45245	3.06028
S100P	2.34048	1.72419
FAM83A	2.29113	2.6324
FGG	2.26965	1.34582
TFPI2	2.18818	1.78061
MUC5B	1.93479	1.32781
PAEP	1.91955	1.30204
B3GNT3	1.91952	2.71778
FGL1	1.91346	1.68509
INSL4	1.90761	3.70373
CDA	1.90364	2.38844
MT1A	1.86611	2.97431
BPIFA1	1.8631	0.828645
DKK1	1.85474	1.97265
INHA	1.85171	2.68678
ARSL	1.85122	2.05018
CALCA	1.84138	1.42847
HGD	1.83371	1.88085
EREG	1.81814	2.10565
CCNP	1.80238	3.64132
TESC	1.79374	1.40272
MSMB	1.78973	1.13179
IGFBP1	1.78344	5.01044
ABCC2	1.78303	2.31936
MSLN	1.75812	0.952237
SULT2B1	1.74335	3.31776
NTS	1.73999	0.693989
HHIPL2	1.71528	2.44934
KRT18	1.68918	4.71727
PKIB	1.67857	3.38152
PPP1R14D	1.65871	1.36012
VSTM2L	1.63012	1.30569
DLL3	1.62642	3.02154
SFTA2	1.60868	0.772093
CPLX2	1.60718	1.99349
SLC35G2	1.58878	5.05279
PON3	1.5568	1.89832
VGF	1.55515	3.84635
CHRNA9	1.54291	3.29156
DUSP4	1.5319	1.94471
TMPRSS11E	1.52903	1.22281
CT83	1.52256	1.06949
MAGEA6	1.51383	0.924891
MAGEA3	1.50808	0.889473
GCNT3	1.502	1.64747
VPREB3	-1.50335	3.2692
LGALS7	-1.53357	1.34506
TNFRSF17	-1.53466	2.78128
GSTM2	-1.54237	3.16531
PLCH2	-1.54432	2.54942
ACSS1	-1.55658	4.38417
DSC3	-1.5595	0.748771
SPRR2F	-1.56994	1.35972
CD19	-1.58038	3.61984
IRX2	-1.58274	1.91947
LGALS7B	-1.58625	1.04218
IRAG2	-1.60216	3.78716
EPHB6	-1.60686	2.67848
TNFRSF13C	-1.60752	4.61693
CXCL14	-1.61075	1.20086
GOLGA8A	-1.61085	3.05761
DSG3	-1.62197	0.678048
NTRK2	-1.62279	1.10177
JCHAIN	-1.63212	1.73389
NSG1	-1.63528	2.55617
NXPH4	-1.6417	1.48803
COLCA2	-1.64929	2.86861
MS4A1	-1.66113	2.6189
DAPL1	-1.66465	0.940144
PKP1	-1.66539	0.758069
TENM2	-1.68004	1.836
COL9A2	-1.69933	2.82682
FGFBP2	-1.71191	1.51221
ATP12A	-1.71935	2.5239
MZB1	-1.72268	2.40071
IRX6	-1.72616	2.71287
KRT6B	-1.73072	0.710388
CALML3	-1.75626	0.69555
IGHV3OR16-17	-1.75801	3.05627
CXCL13	-1.79298	2.02568
WFDC5	-1.81178	2.05281
CSTA	-1.81521	1.36545
GABRE	-1.82383	2.64061
HR	-1.82548	2.2945
CLCA2	-1.83006	0.869959
PRSS12	-1.85596	3.15528
KRT15	-1.86121	1.26997
SCGB1A1	-1.89919	0.926284
MS4A15	-1.90566	2.1451
CHIT1	-1.925	2.40531
CAPNS2	-1.94687	1.4395
SERPINB3	-1.95144	1.21878
SFTPC	-1.99266	0.851193
SERPINB13	-1.99838	1.29632
GJB6	-2.03335	1.24495
NDUFA4L2	-2.04131	2.24588
SPRR2D	-2.04601	1.10963
SPRR2E	-2.10011	1.20822
TP63	-2.14903	1.29507
CD79A	-2.16063	3.43063
POU2AF1	-2.22175	5.45901
KRT17	-2.26328	1.16669
PGC	-2.41576	1.30544
FDCSP	-2.52565	2.26938
SPRR2A	-2.65193	1.31859
KRT5	-2.99726	1.07501
